# Supplementary material for: Room temperature formation of organic–inorganic lead halide perovskites: design of nanostructured and highly reactive intermediates
Source: Royal Society of Chemistry journal article supplement (doi:10.1039/c6ta09845b), 2017-01-01
Supplement: c6ta09845b1.pdf [file c6ta09845b1.pdf]

## Electronic Supplementary Information

### Room Temperature Formation of Organic-Inorganic Lead Halide Perovskites: Design of Nanostructured and Highly Reactive Intermediates

Hong Zhang, <sup>a</sup> Dan Li, <sup>c</sup> Jiaqi Cheng, <sup>a</sup> Francis Lin, <sup>b</sup> Jian Mao, <sup>a</sup> Alex K.-Y. Jen,<sup>b</sup> Michael Grätzel <sup>d</sup> and Wallace C.H. Choy<sup>\*,a</sup>

<sup>a</sup> Department of Electrical and Electronic Engineering, The University of Hong Kong, Pok Fu Lam Road, Hong Kong, China. E-mail: chchoy@eee.hku.hk

<sup>b</sup> Department of Materials Science & Engineering, University of Washington, Seattle, Washington 98195, United States.

<sup>c</sup> Key Laboratory of Luminescence and Optical Information, Ministry of Education, School of Science, Beijing Jiaotong University, Beijing 100044, China.

<sup>d</sup> Laboratory for Photonics and Interfaces, Institute of Chemical Sciences and Engineering, School of Basic Sciences, Ecole Polytechnique Fédérale de Lausanne, CH-1015 Lausanne, Switzerland.

**Table S1. The basic chemical properties of different ligands.**

| Ligand | van der Waals Volume (cm <sup>3</sup> . mol <sup>-1</sup> ) <sup>a</sup> | Boiling point (°C) | PbI <sub>2</sub> solubility (mg/ml) <sup>b</sup> | PbI <sub>2</sub> .(L) <sub>x</sub> conversion time (s) <sup>c</sup> | PbI <sub>2</sub> /L coordination ratio <sup>d</sup> | Interlayer spacing of PbI <sub>2</sub> .(L) <sub>x</sub> (Å) |
|--------|--------------------------------------------------------------------------|--------------------|--------------------------------------------------|---------------------------------------------------------------------|-----------------------------------------------------|--------------------------------------------------------------|
| -      | -                                                                        | -                  | -                                                | -                                                                   | -                                                   | 6.918 <sup>e</sup>                                           |
| TBP    | 146.05                                                                   | 197                | 148                                              | 300                                                                 | 1:1                                                 | 15.152                                                       |
| Py     | 79.89                                                                    | 115                | <5                                               | 100                                                                 | 1:2                                                 | 8.598                                                        |
| DMF    | 77.52                                                                    | 153                | 475                                              | 50                                                                  | 1:1                                                 | 9.196                                                        |
| DMSO   | 71.43                                                                    | 189                | 595                                              | 140                                                                 | 1:2                                                 | 8.437                                                        |
| EDA    | 68.82                                                                    | 116                | <5                                               | 50                                                                  | 1:2                                                 | -                                                            |

a) <http://www.molinspiration.com/cgi-bin/properties>. b) The solubility test was conducted at room temperature (25 °C). c) The progress of chemical reactions was monitored by UV-vis spectra. d) The data were estimated by TGA. e) The interlayer spacing of

## Thermogravimetric analysis (TGA)

The content of L in the  $\text{PbI}_2 \cdot (\text{L})_x$  complexes were estimated by TGA. The TGA results of  $\text{PbI}_2 \cdot (\text{L})_x$  intermediates were shown in **Figure S1**. The  $\text{PbI}_2 \cdot (\text{Py})_2$  and  $\text{PbI}_2 \cdot \text{DMF}$  complexes exhibited a one-step decomposition process with weight-loss of 25.41% and 13.34% at 135.49°C and 113.11°C, respectively.  $\text{PbI}_2 \cdot (\text{DMSO})_2$  intermediate exhibited a two-step decomposition process with weight-loss of 12.40% at each step and was completely decomposed at 142.59°C. Both  $\text{PbI}_2 \cdot (\text{EDA})_2$  and  $\text{PbI}_2 \cdot \text{TBP}$  intermediate also shown a two-step decomposition process and completely decomposed at 328.72°C and 263.71°C with weight-loss of 19.72% and 23.0%, respectively. The value of  $x$  is calculated as follows:

$$x = \frac{M_w(\text{PbI}_2) \times W_{\text{loss}}\%}{M_w(\text{L})(1 - W_{\text{loss}}\%)} \quad (1)$$

where  $M_w(\text{PbI}_2) = 461$  g/mol,  $M_w(\text{L})$  is the molecular weight of ligand,  $W_{\text{loss}}\%$  is refer to the weight proportion of ligand in the  $\text{PbI}_2 \cdot (\text{L})_x$  intermediates. Then, we can get the content of L in the  $\text{PbI}_2 \cdot (\text{L})_x$  intermediates as we summarized in **Table S1**.

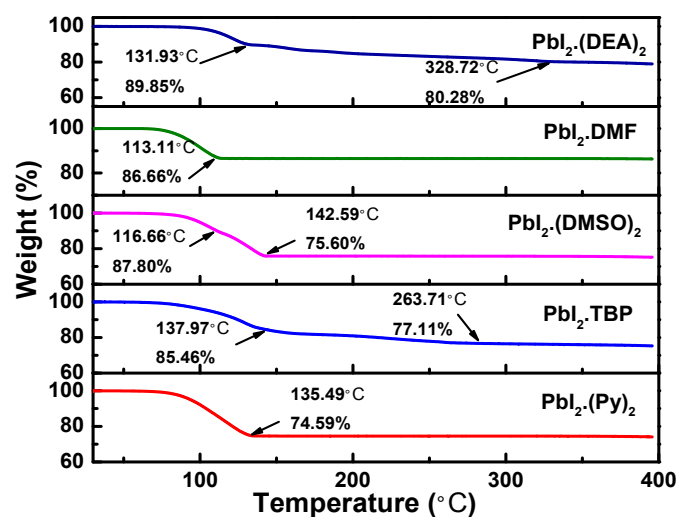

**Figure S1.** Thermogravimetric analysis (TGA) of  $\text{PbI}_2 \cdot (\text{L})_x$  intermediates.

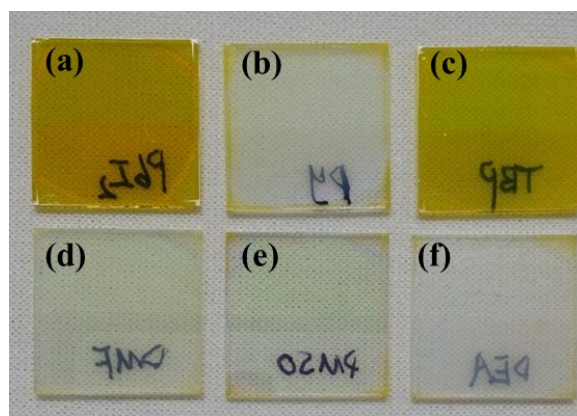

**Figure S2.** The photographs of  $\text{PbI}_2(\text{L})_x$  intermediates in which (a) is  $\text{PbI}_2$ , (b) is  $\text{PbI}_2(\text{Py})_2$ , (c) is  $\text{PbI}_2.\text{TBP}$ , (d) is  $\text{PbI}_2.(\text{DMSO})_2$ , (e) is  $\text{PbI}_2.\text{DMF}$ , and (f) is  $\text{PbI}_2.(\text{DEA})_2$  film.

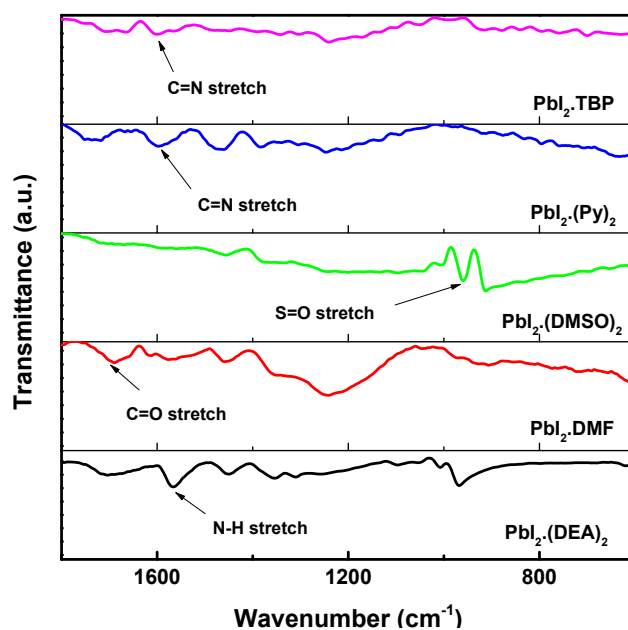

**Figure S3.** Fourier transform infrared spectrometer (FTIR) of  $\text{PbI}_2(\text{L})_x$  complexes.

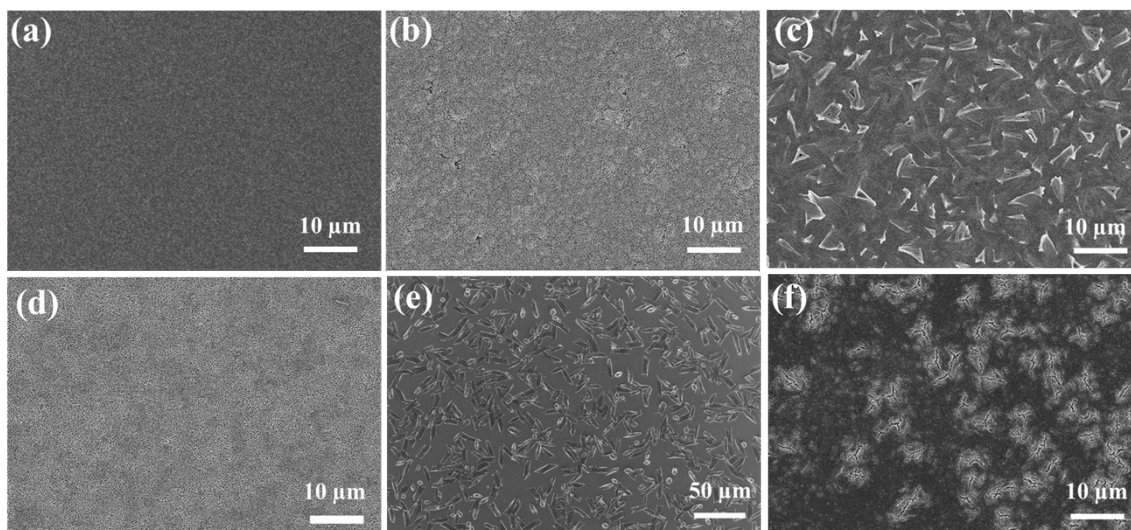

**Figure S4.** Top-view SEM images of  $\text{PbI}_2(\text{L})_x$  intermediates with low magnification in which (a) is untreated  $\text{PbI}_2$ , (b) is  $\text{PbI}_2(\text{Py})_2$ , (c) is  $\text{PbI}_2\text{TBP}$ , (d) is  $\text{PbI}_2(\text{DMSO})_2$ , (e) is  $\text{PbI}_2\text{DMF}$  and (f) is  $\text{PbI}_2(\text{EDA})_2$  film.

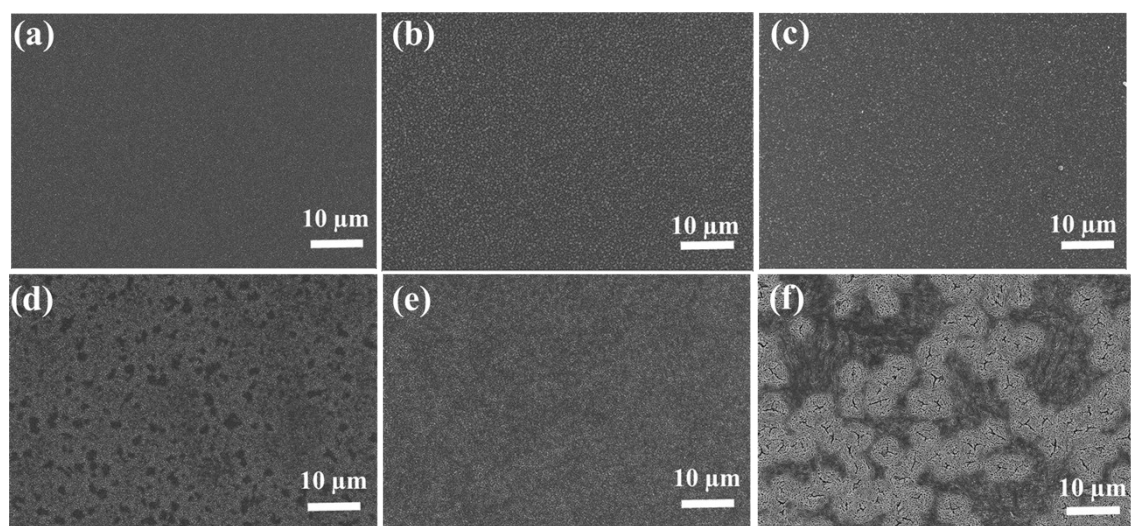

**Figure S5.** Top-view SEM images of  $\text{CH}_3\text{NH}_3\text{PbI}_3$  films with low magnification from (a)  $\text{PbI}_2$ , (b)  $\text{PbI}_2(\text{Py})_2$ , (c)  $\text{PbI}_2\text{TBP}$ , (d)  $\text{PbI}_2(\text{DMSO})_2$ , and (e)  $\text{PbI}_2\text{DMF}$  on  $\text{NiO}_x/\text{ITO}$  substrate. (f) Top-view SEM image of  $\text{PbI}_2(\text{EDA})_2$  film after dipping into  $\text{CH}_3\text{NH}_3\text{I}$  solution with low magnification.

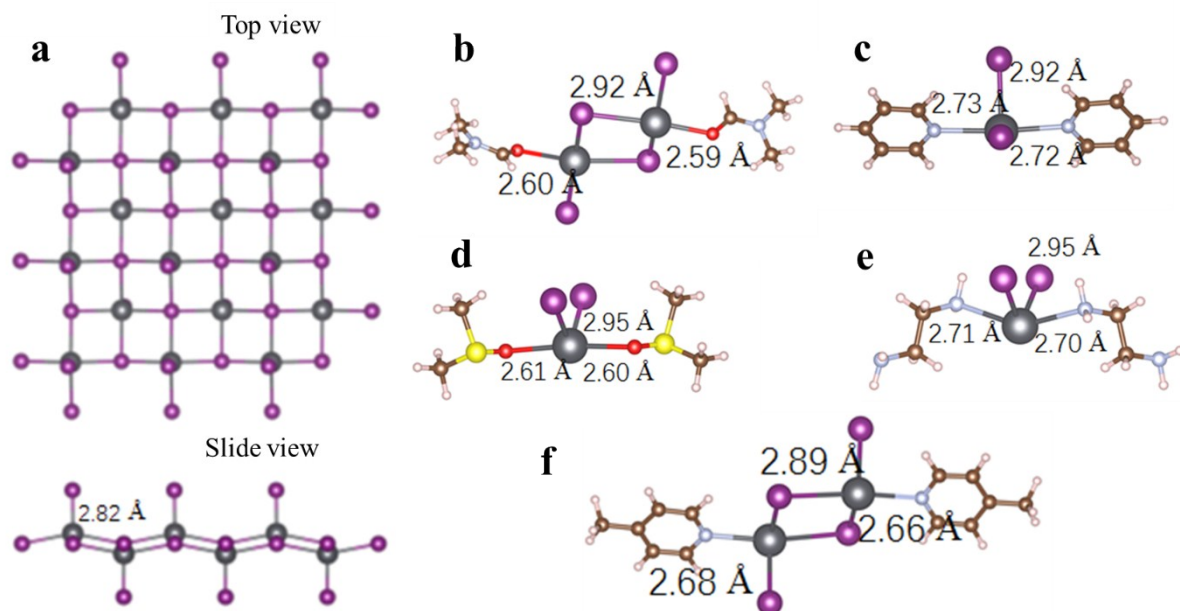

**Figure S6.** Crystallographic structures of  $\text{PbI}_2$  (a),  $\text{PbI}_2\cdot\text{DMF}$  (b),  $\text{PbI}_2\cdot(\text{Py})_2$  (c),  $\text{PbI}_2\cdot(\text{DMSO})_2$  (d),  $\text{PbI}_2\cdot(\text{EDA})_2$  (e), and  $\text{PbI}_2\cdot\text{TBP}$  (f).

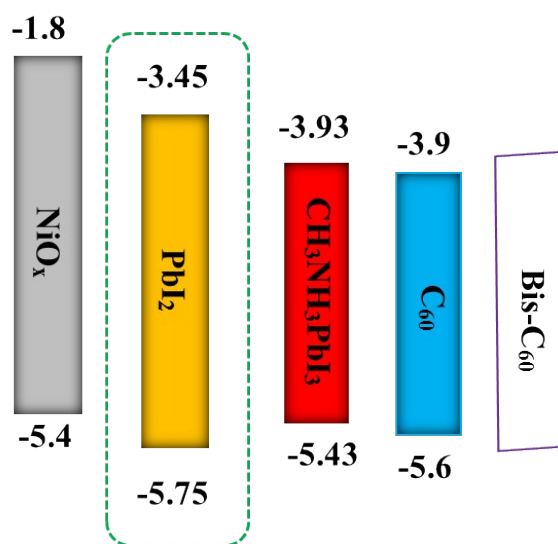

**Figure S7.** Energy diagram of each material in the PVSC device, with energy levels given in eV.
